# Supplementary material
Source: publisher figshare collection journal article supplement (https://acs.figshare.com/ndownloader/files/4154635)
Supplement: Supplementary file 1 [file 4154635]

# Supporting Information

## Using Systematic Comparisons of 2D and 3D Structures to Reveal Principles of Molecular Organization. Linear Bis-Isophthalic Acids and their Tetraesters

Hui Zhou, Thierry Maris, and James D. Wuest\*

*Département de Chimie, Université de Montréal*

*Montréal, Québec H3C 3J7, Canada*

| Contents                                                                                                                                                                        | Page |
|---------------------------------------------------------------------------------------------------------------------------------------------------------------------------------|------|
| I. <b>Figure S1.</b> Thermal atomic displacement ellipsoid plot of the structure of crystals of tetraester <b>3</b> grown from hexane/CHCl <sub>3</sub> .                       | S3   |
| II. <b>Figure S2.</b> Thermal atomic displacement ellipsoid plot of the structure of crystals of tetraester <b>4a</b> grown from hexane/CHCl <sub>3</sub> .                     | S4   |
| III. <b>Figure S3.</b> Thermal atomic displacement ellipsoid plot of the structure of crystals of tetraester <b>5</b> • CHCl <sub>3</sub> grown from hexane/CHCl <sub>3</sub> . | S5   |
| IV. <b>Figure S4.</b> Thermal atomic displacement ellipsoid plot of the structure of crystals of tetraester <b>7</b> • CHCl <sub>3</sub> grown from hexane/CHCl <sub>3</sub> .  | S6   |

|       |                                                                                                                                                                                                                                  |     |
|-------|----------------------------------------------------------------------------------------------------------------------------------------------------------------------------------------------------------------------------------|-----|
| V.    | <b>Figure S5.</b> Representation of the square grid formed by adsorption of tetraester <b>5</b> on HOPG, showing perpendicular molecules in a planar $D_{2h}$ conformation linked to neighbors by multiple C-H...O interactions. | S7  |
| VI.   | <b>Figure S6.</b> Supplementary STM images of the adsorption of tetraester <b>6</b> on HOPG.                                                                                                                                     | S8  |
| VII.  | <b>Figure S7.</b> Supplementary STM images of the adsorption of tetraester <b>7</b> on HOPG.                                                                                                                                     | S9  |
| VIII. | <b>Figure S8.</b> Supplementary STM image of the competitive adsorption of tetraesters <b>3</b> and <b>7</b> on HOPG.                                                                                                            | S10 |
| IX.   | <b>Figure S9.</b> Supplementary STM image of the competitive adsorption of tetraesters <b>3</b> and <b>4a</b> on HOPG.                                                                                                           | S11 |
| X.    | <b>Figure S10.</b> Supplementary STM image of the competitive adsorption of tetraesters <b>4a</b> and <b>7</b> on HOPG.                                                                                                          | S12 |
| XI.   | <b>Figure S11.</b> Supplementary STM image of the adsorption of tetramethyl ester <b>4b</b> on HOPG.                                                                                                                             | S13 |

\*Author to whom correspondence may be addressed: james.d.wuest@umontreal.ca

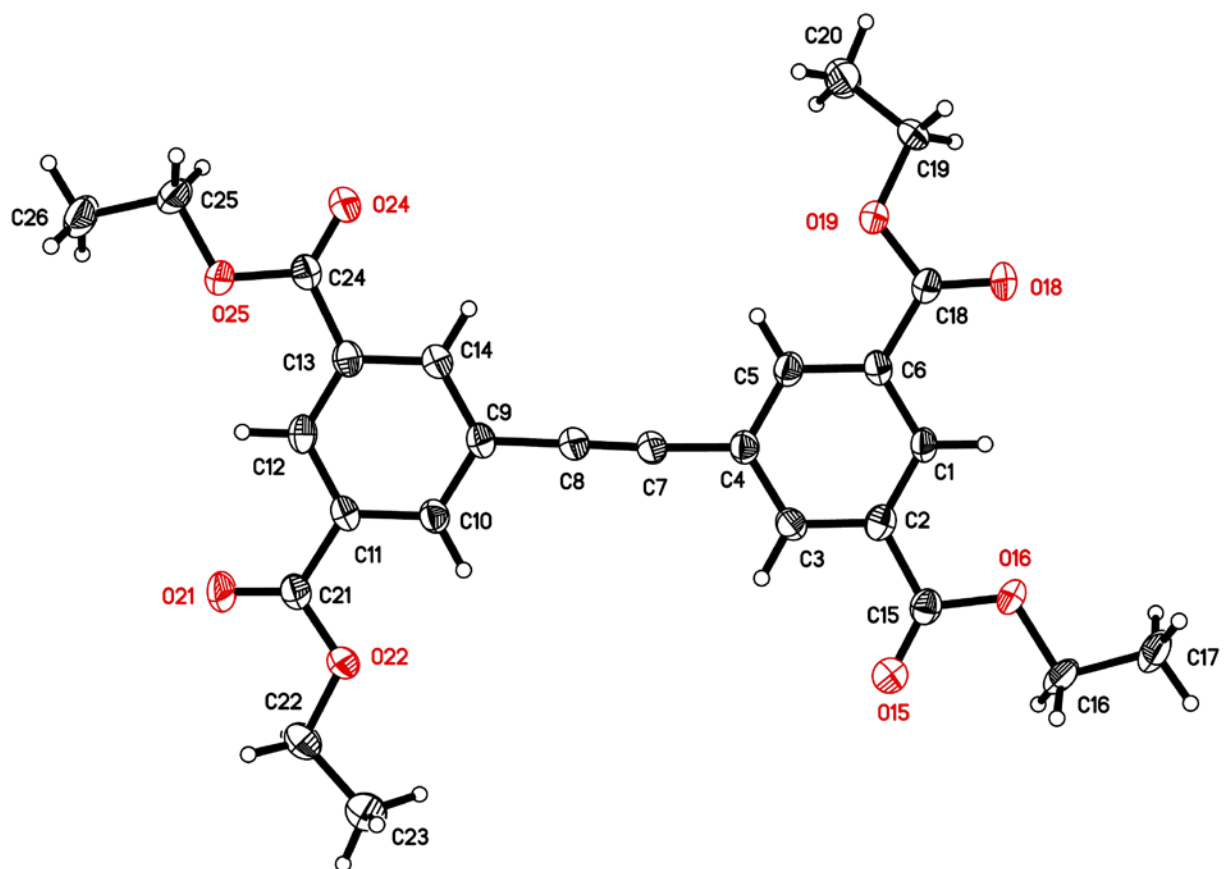

**Figure S1.** Thermal atomic displacement ellipsoid plot of the structure of crystals of tetraester **3** grown from hexane/ $\text{CHCl}_3$ . The ellipsoids of non-hydrogen atoms are drawn at the 50% probability level, and hydrogen atoms are represented by a sphere of arbitrary size.

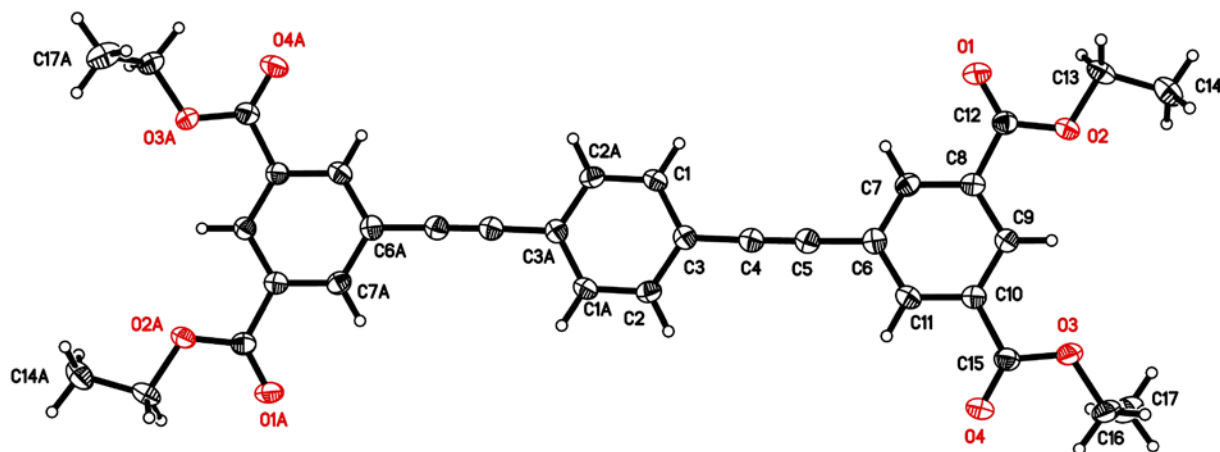

**Figure S2.** Thermal atomic displacement ellipsoid plot of the structure of crystals of tetraester **4a** grown from hexane/ $\text{CHCl}_3$ . The ellipsoids of non-hydrogen atoms are drawn at the 50% probability level, and hydrogen atoms are represented by a sphere of arbitrary size.

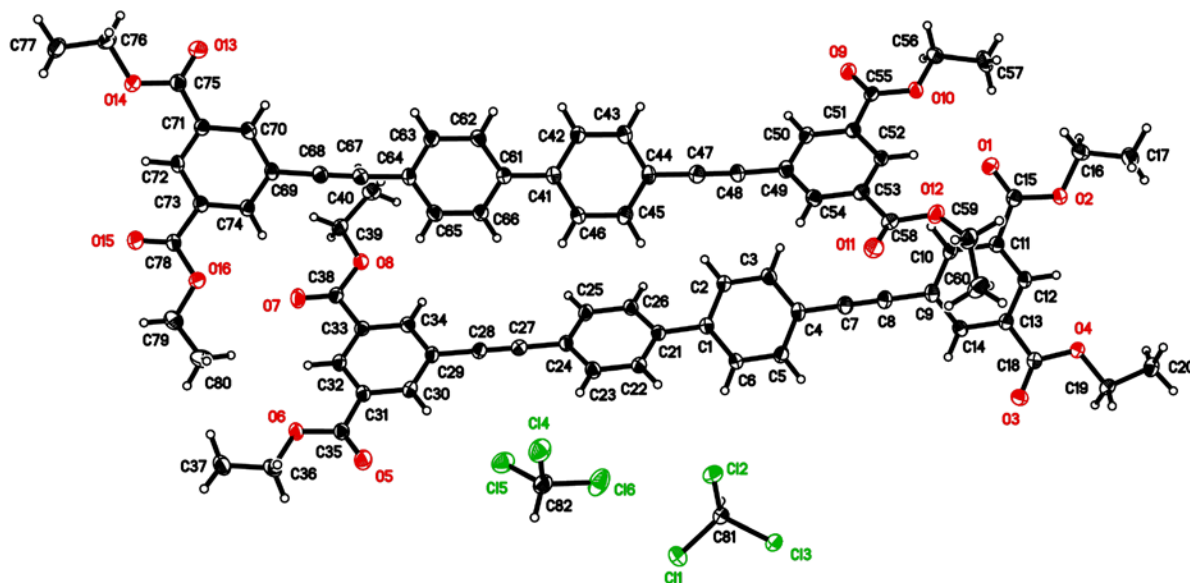

**Figure S3.** Thermal atomic displacement ellipsoid plot of the structure of crystals of tetraester 5 • CHCl<sub>3</sub> grown from hexane/CHCl<sub>3</sub>. The ellipsoids of non-hydrogen atoms are drawn at the 50% probability level, and hydrogen atoms are represented by a sphere of arbitrary size.

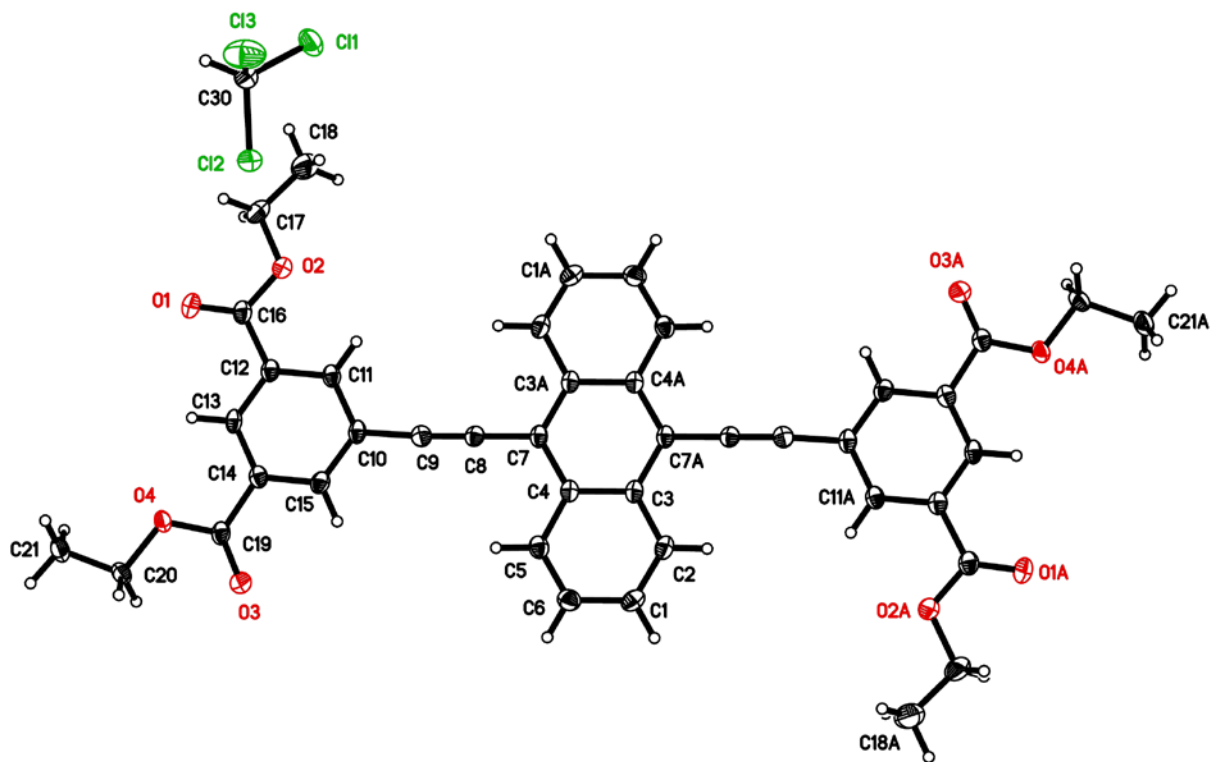

**Figure S4.** Thermal atomic displacement ellipsoid plot of the structure of crystals of tetraester **7**

- 2 CHCl<sub>3</sub> grown from hexane/CHCl<sub>3</sub>. The ellipsoids of non-hydrogen atoms are drawn at the 30% probability level, and hydrogen atoms are represented by a sphere of arbitrary size.

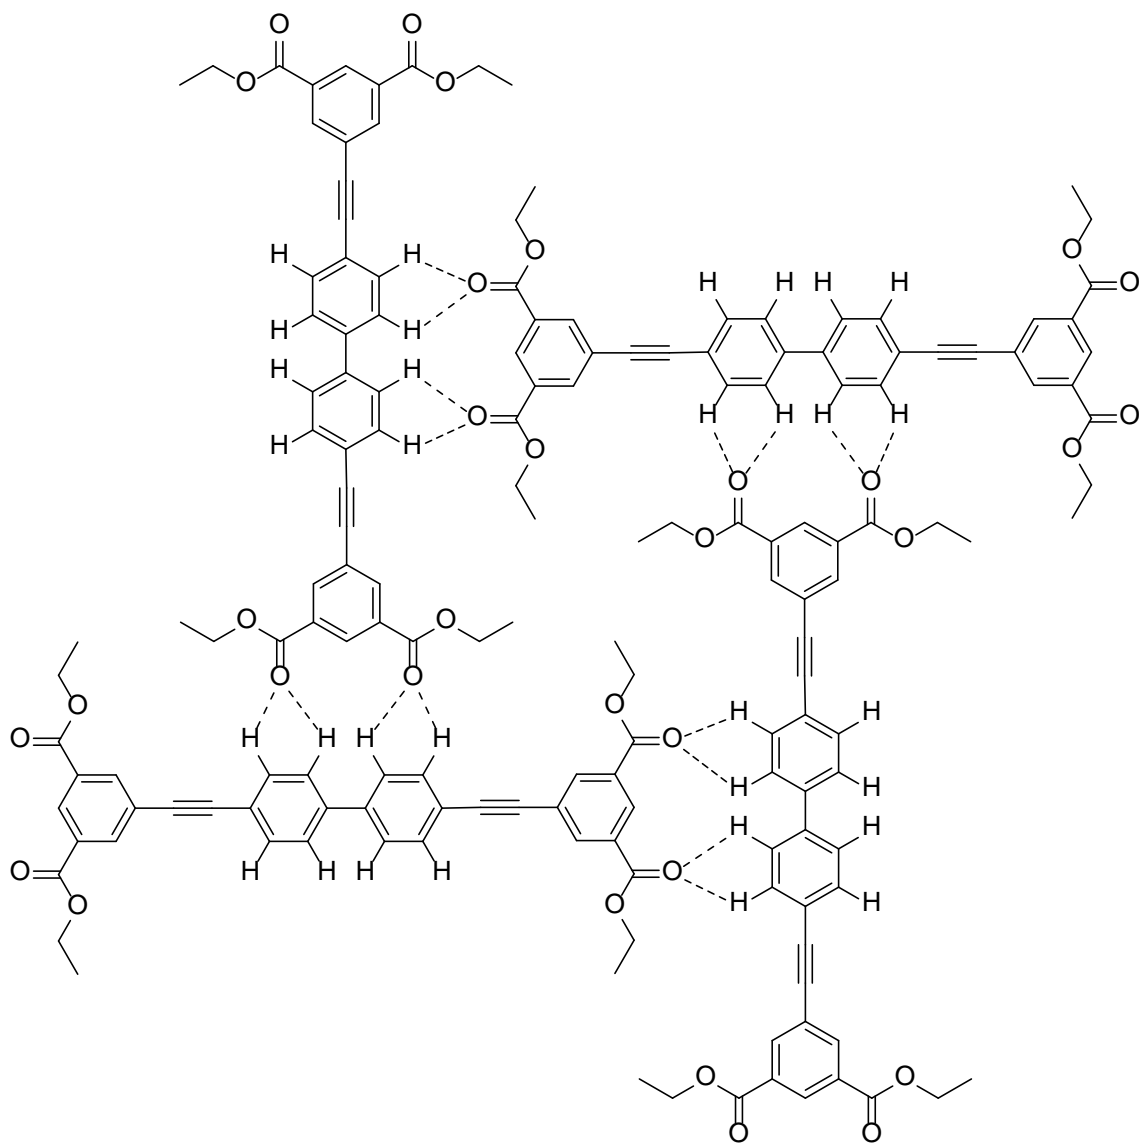

**Figure S5.** Representation of the square grid formed by adsorption of tetraester **5** on HOPG, showing perpendicular molecules in a planar  $D_{2h}$  conformation linked to neighbors by multiple C-H...O interactions.

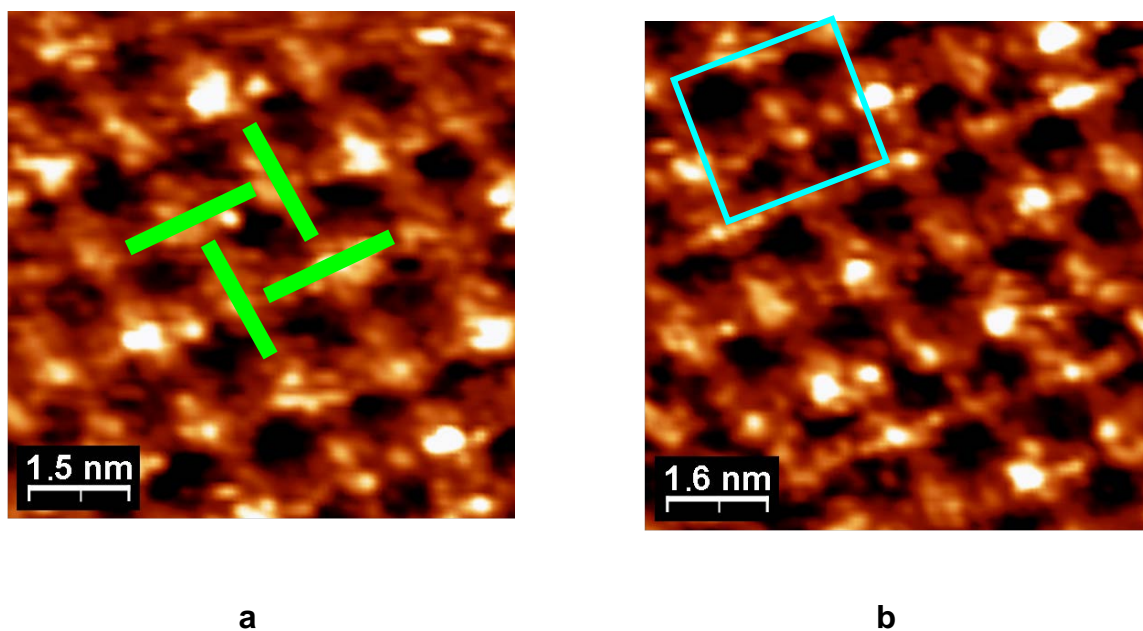

**Figure S6.** Supplementary STM images of the adsorption of tetraester **6** on HOPG (deposition from heptanoic acid, with  $V_{bias} = -1.5$  V and  $I_{set} = 50$  pA). (a) View of the square-grid network, with individual molecules represented by green bars to facilitate interpretation of the pattern of contrasts. (b) Additional view of the network, with local geometric irregularities highlighted in blue.



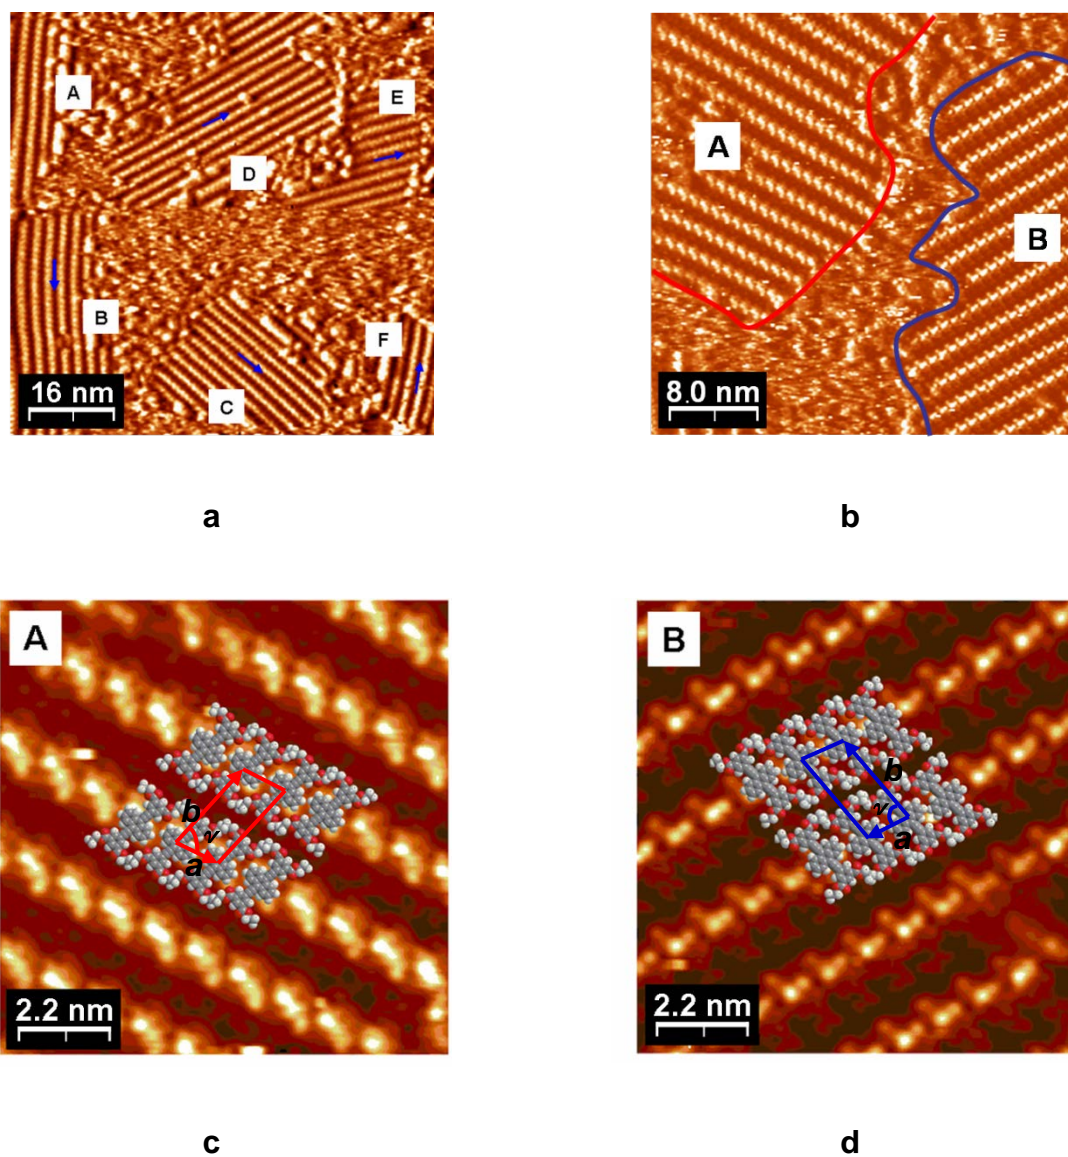

**Figure S7.** Supplementary STM images of the adsorption of tetraester **7** on HOPG (deposition from heptanoic acid, with  $V_{bias} = -1.5$  V,  $I_{set} = 50$  pA in Figure S7a, and  $I_{set} = 100$  pA in Figures S7b-d). (a) View of an area of  $80\text{ nm} \times 80\text{ nm}$ , showing six domains labeled A-F with diverse orientations relative to the underlying HOPG. (b) Additional image showing enantiomorphous domains A and B. (c) Enlarged view of domain A, with superimposed molecular models to show 2D chirality. (d) Similar enlarged view of domain B.

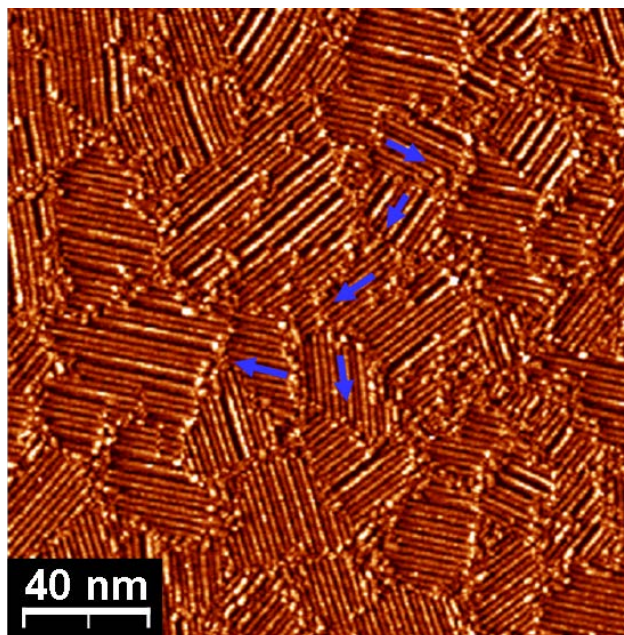

**Figure S8.** Supplementary STM image of the competitive adsorption of tetraesters **3** and **7** on HOPG (deposition of an equimolar mixture in heptanoic acid, with  $V_{bias} = -1.5$  V and  $I_{set} = 100$ ), showing multiple domains of pure tetraester **7**. Rows in adjacent domains tend to interact at angles that are multiples of  $60^\circ$ .

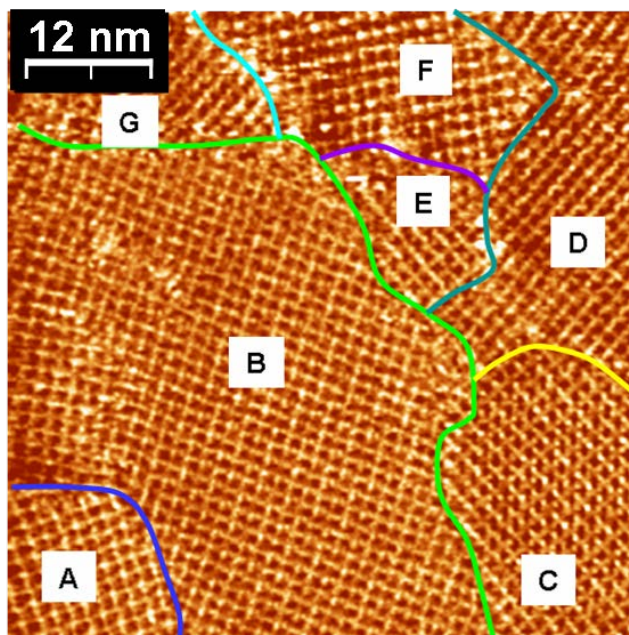

**Figure S9.** Supplementary STM image of the competitive adsorption of tetraesters **3** and **4a** on HOPG (deposition of an equimolar mixture in heptanoic acid, with  $V_{bias} = -1.5$  V and  $I_{set} = 100$ ), showing multiple domains of pure tetraester **4a**.

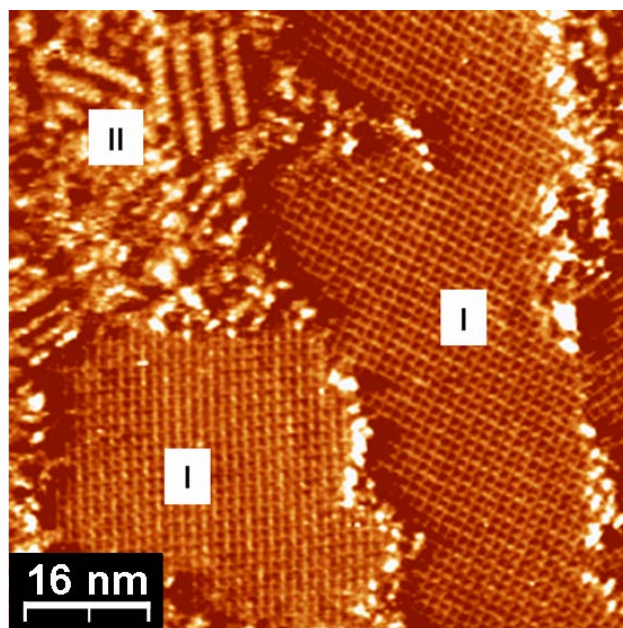

**Figure S10.** Supplementary STM image of the competitive adsorption of tetraesters **4a** and **7** on HOPG (deposition of an equimolar mixture in heptanoic acid, with  $V_{bias} = -1.5$  V and  $I_{set} = 100$ ), showing the predominant adsorption of tetraester **4a**.



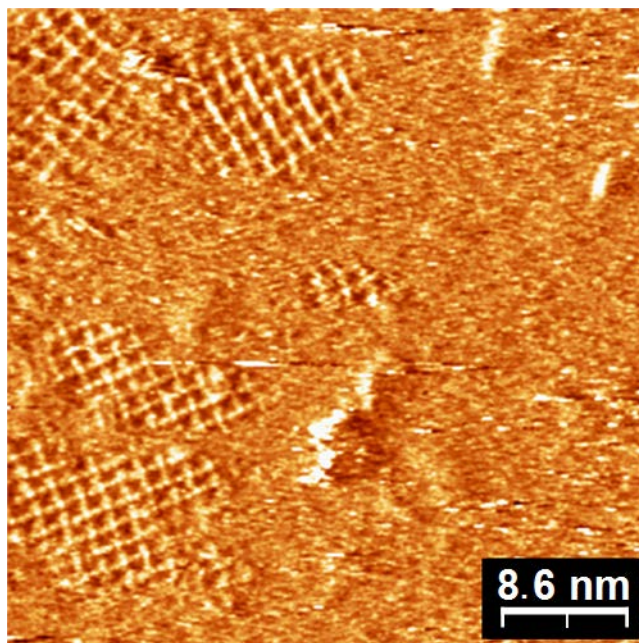

**Figure S11.** Supplementary STM image of the adsorption of tetramethyl ester **4b** on HOPG to form small areas of square grids (deposition from heptanoic acid, with  $V_{bias} = -1.5$  V and  $I_{set} = 50$  pA).
